# Supplementary material for: Power-law population heterogeneity governs epidemic waves
Source: PubMed Central journal article supplement (PMC7556502; doi:10.1371/journal.pone.0239678), 2020-10-14
Supplement: pone.0239678.s002.pdf [file pone.0239678.s002.pdf]

## Response to Referee 1

In the paper under review, the authors give a detailed study of the classical SIR model for epidemics in the case when the heterogeneity of the susceptible population is allowed. The main focus is made on the case where the initial susceptibility distribution has gamma density with parameter  $\alpha$ . This, in particular, leads to the time- dependent reproduction number  $R(t)$ , decreasing as hyperbolic function, i.e.  $R(t) = (\bar{x}(t))^{1+\alpha} R_0$ . The authors provide quantitative properties of the model, such as the herd immunity level, the final size of epidemics, etc. An important conclusion is that, in the heterogeneous population, the herd immunity level can be much lower than in homogeneous case (typically 60%).

In my opinion, the subject and results of the paper are very interesting, the paper is well written and I recommend it for publishing in the journal after minor revision. Attached, please find a list of comments.

We thank the referee for a careful reading of our manuscript

1. In the models for SARS-CoV-2 epidemics, the SEIR model is in widespread use, where E stands for the "exposed" compartment. I wonder, if it is possible to relate it with the generalized SIR model in (1)–(2) with time- varying parameters?

In our work we focus on the simpler SIR model where the distinction between exposed and infected is not made. The additional "exposed" state E in the SEIR model introduces a time delay between exposure to a pathogen and the onset of infectiousness. This extra delay due to the exposed state could be captured by an exponential memory kernel in Eq (2) with an extra relaxation time describing the delay. However, the main properties of the epidemic wave such as herd immunity levels are only weakly affected by the extra short delay in the SEIR model. In our work we focus on the SIR model because it captures essential features of an epidemics in a minimal model. In our revised manuscript we now relate to the SEIR model in the discussion.

2. The model in eqs. (1)–(2) is not very clearly explained. The classical SIR model assumes three components – susceptible (S), infected (I) and recovered (R). Whereas eqs. (1)–(2) of the paper does not include part R. Also, it is slightly unclear the meaning of  $\bar{x}$ . It would be useful to explain what does it mean "dimensionless average susceptibility". Usually the coefficient at  $I/S$  is called "infection rate" and can admit values larger (or smaller) than 1.

We use the symbol R for the time dependent reproduction number rather than the number of recovered individuals. Note that the number of recovered individuals is given by  $\#recovered = N - S - I$ . We now add this information. In the revised manuscript we have rewritten the explanation of the model in order to be more clear about beta and  $\bar{x}$  and we now call beta the infection rate.

3. p. 5. It is mentioned that time-varying  $\beta$  could correspond to seasonal changes or mitigation measure. For illustrative purposes, it would be nice to see concrete forms of  $\beta(t)$  in such cases.

While in the first parts of the manuscript we consider constant beta, we discuss in section III.C different mitigation scenarios where we choose specific forms of  $\beta(t)$  in order to discuss effects of mitigation during this year's SARS-Cov2 epidemic, see Fig. 6.

4. It is well-known that SIR-type compartment models are rather sensitive to initial conditions. It would be good to see some discussion on this sensitivity. At least, how the graphs will change if you take other values than  $I_0 = 10$ .

The initial condition  $I_0$  is not important for our work and a change in  $I_0$  would essentially only shift the absolute time of the initial point if the time of the wave peak is known. Once the wave is progressing and reaches its peak, its behaviour depends only very weakly on the initial conditions if the initial number of infected is small compared to the population size. Note that in the appendices we do provide exact expressions for many quantities as a function of  $I_0/N$ , revealing

the role of initial conditions. However for all plots and results shown in the manuscript the initial number  $I_0$  is completely unimportant. Because the plots for other choices of  $I_0$  would not be distinguishable from the ones shown we prefer not to show plots with other values of  $I_0$ .

Another reason not to discuss different  $I_0$  is that at the early time of the epidemics when  $I$  went from say 10 to 20 we have absolutely no information about the epidemic wave and therefore it does not help discussing whether it started with  $I_0=2$  very early or with  $I_0=15$  several days later.

5. p. 7, l. -9. Since  $s$  depends on both  $x$  and  $t$ , I would recommend to write  $S(t) = \int_{I_0}^{\infty} dx s(x, t)$ . Similarly, in eq. (10), as the right-hand side depends on  $t$ , better to write  $\bar{x}(t) = (1/S(t)) \int_{I_0}^{\infty} dx x s(x, t)$ .

We have changed these expressions as the referee suggests.

6. p. 7, l. -2. The meaning of the variable  $\tau$  ("a measure for how far the epidemic has advanced") should be explained better.

The variable  $\tau$  emerges from a trick to solve the equations. It does not have a physical meaning but it has some clear and important properties. In the revised manuscript we now explain better the variable  $\tau$ .

7. p. 8, eq. (12). Strictly speaking, eq. (12) gives a density function, not distribution. Also, you may wish to add that  $\alpha > 0$  and to write a precise form  $s_0(x)=\dots$ . (The symbol ' $\sim$ ' usually means asymptotic equivalence.) Also, I wonder if it would be possible to introduce additional flexibility in the initial susceptibility by introducing two-parameter gamma distribution with density  $s_0(x)=\dots$ .

We agree with the referee and have added that  $\alpha > 0$ . Note that we thought about all these points very carefully and we have good reasons to present the work in the way we did. We have used the term distribution in the context of our aim to make the paper more easily accessible for a broader readership including non-experts for whom the term probability distribution is usually better known. For this reason we have also kept the equations in the main part of the manuscript rather light, but we provide all the precise and full expressions in the Appendices for expert readers. The appendices carry a lot of substance and should not be seen as secondary.

Note that the precise form of the initial density function  $s_0$  is provided in Appendix C in Eq. (C1). In our revised manuscript we now refer to the appendix to clarify what the normalization factor is.

We have of course checked that the full 2-parameter gamma distribution does not provide any further flexibility. The reason is that we choose without loss of generality  $\bar{x}=1$  at the initial time point. With the second parameter of the gamma distribution we can change this initial value but this change can be absorbed by changing the infection rate  $\beta$ . So in fact one can see  $\beta$  as the second parameter. But since  $\beta$  already exists in the classical SIR model we keep it and only add one new parameter  $\alpha$  describing the ratio of variance and mean.

Minor comments:

p. 3, l. -11. Delete 'the'.

Done

p. 8, eq. (13). Please add more details how this equality is obtained.

We added some information and now refer to Appendix C for details.

p. 9. Please add more details how eqs. (18) and (19) are obtained.

We added a reference to the Appendix C where the details are provided.

p. 22. It seems that the Lambert W -function should be defined by  $W(z)e^{W(z)} = z$ .

Done

## Response to Referee 2

In this manuscript, the authors propose a generalized SIR model taking into account the heterogeneity of the population, i.e., a distribution of the susceptibility of being infected, in terms of a parameter  $\alpha$ , which is the power-law exponent of the susceptibility distribution when small values of  $\alpha$  are considered. In other words, when  $\alpha \rightarrow \infty$ , the classical SIR model is recovered and for the case of  $\alpha \rightarrow 0$ , the heterogeneity of the population is incorporated into the SIR model. The key-result of their work is that the population herd immunity is earlier achieved in the case of a heterogeneous population, implying in a lower number of infected people and fatalities. The authors employ their model to analyze the case of the Covid-19 spread in Germany and discuss the importance of taking the population's heterogeneity in the effectiveness of mitigation actions, such as social distancing. Below, I raise some points to be addressed:

- In panel (a) and (d) of Fig. 1, it is not quite clear to me why the number of infected people is lower for the heterogeneous SIR model. Also, what is the justification for using the specifically values of  $R_0 = 2.5$ ,  $\gamma = 0.13 \text{ day}^{-1}$  and  $\alpha = 0.1$ ? I suggest that the authors make these points clear;

The figure just shows the fact that the number of infected people is lower in the heterogeneous SIR model to clearly show this point. The reasons are the lowered herd immunity levels given by Eq (19) resulting from the drop in  $\bar{x}$  as shown in Fig. 1 f. In appendix C we provide an exact analysis of the nonlinear dynamics that reveals these surprising properties.

In order to explain this better, we now clarify after Eq (22) that the drop of  $\bar{x}$  is the reason for a reduced herd immunity level and resulting lower infection numbers.

The parameter values are here just for illustrative purposes. The qualitative behaviors do not depend on the parameter choice within broad ranges. However the values chosen are rounded versions of values we found are relevant to the current SARS-Cos2 epidemics are typical values used in the current epidemics.  $\gamma = 0.13$  corresponds to individuals being infectious during one week, and this parameter does not affect the shape but only the duration of the wave.  $\alpha=0.1$  was chosen so that the difference between panels (a) and (d) is clearly visible but such that the maximum of  $I$  can still be seen in (d).

- For future works, I believe it would be interesting to explore the very same analysis here employed in terms of the heterogeneity of the population in the light of the SIRS model, since it would be interesting to analyse how the population's susceptibility distribution is affected in the case where Recovered people can become susceptible of being infected again. Perhaps it would interesting to mention this in the main text;

There are many open and interesting questions that one can address with our approach. We agree that it will be very interesting to look into effects where recovered individuals becomes infected again. In the revised manuscript we now mention the SIRS model in the discussion.

- On page 6, the authors mention about the Lambert W function and points to a more detailed discussion about it in Appendix A. At this point, I believe it is worth adding a couple of references for clarity both in the main text and in Appendix A about the Lambert W function, just for the sake of completeness;

We have added a reference on the Lambert W function.

- The authors should correct on page 3, third paragraph, first sentence, the typo "the" twice in the sentence "In the heterogeneous SIR model proposed here, the qualitative behaviours of the the epidemic wave are unchanged.";

Thanks - corrected

- I suggest that the first sentence of page 8 "Eq. (9) can be then be written as" to be corrected to "Eq. (9) can then be written as...";

Thanks - done

- On page 8, the authors write "The dynamics of epidemic waves depends on the shape of the initial distribution  $s_0(x)$ . Here, we consider distributions that have the special property of shape invariance under the dynamics of epidemics. This property is satisfied by a gamma distribution". I suggest that the authors state if only the gamma distribution satisfies such a condition and, if it is not the case, then it would be interesting to add a sentence about the consideration of other distributions as well;

To our knowledge the gamma distribution is the only distribution that is shape invariant under the dynamics. However to be cautious we avoid claiming this fact as we do not have a proof. Our work and our results do not depend on the the gamma distribution being the only shape invariant distribution.

- In Fig 4 panel (a), I suggest that the authors state why their solutions of the heterogeneous SIR model do not incorporate the initial increase in the number of infected people and the small increase between Jun and Jul for both the number of infections and fatalities. The same holds for panel (c) in the case of the initial growth of both the cumulative number of infected people and fatalities.

In Fig. 4 we simply compare fits of our model to data. The fits show that the data based on reported cases that lead to deaths (blue), which probably measures more reliably the progression of serious illnesses, is better captured by the model than simply using the reported number of reported cases (red). A possibility for the difference to the data early and in June is that the blue data gives a better representation of the epidemics than the red data. However we have refrained from making such statements because all available data have problems and there are many reasons why there could be serious biases and errors in the data.

In our manuscript we note on p. 13 that it is surprising that the model fits both types of data rather well even though we only have three time independent parameters (note the classical SIR model cannot account for this data).

- In panel (f), it would be interesting to discuss what is the meaning of tau saturating at the specific value of  $\sim 0.2$ , as well as about the meaning of the average susceptibility  $\bar{x}$  saturating close to the  $\tau$  curve? What does this mean? I suggest that the authors briefly discuss about these points;

The final value of tau is explained in Appendix C where we show that tau reaches a fixed final value when the epidemics dies out that is described exactly by the implicit equation (C11) in the revised manuscript. In our revised manuscript we now mention in the main text on p. 7 that tau reaches a final value and we add a reference to appendix C when discussing panel (f) of Fig. 4. Note that the relationship between tau and  $\bar{x}$  is given in Eq. (14). The similarity of  $\bar{x}$  and  $\tau$  at the end of the wave is a coincidence and consistent with Eq. (14).

- Based on their discussions, the achievement of the herd immunity is key regarding the fade of the disease spread. Based on their discussion about and heterogeneous population, do the authors have any suggestions for public policies in order to minimize the number of infections and, consequently, the number of fatalities?;

We have on purpose refrained from a discussion of public policy. Here we want to focus on the concepts and the science. The science presented here is clear and rigorous. Implications for policy are much less rigorous and depend on many other factors and can be coloured by opinions. We think that our work has many implications for public policy and that it will stimulate and be useful for future discussions but we do not want to weaken our work by adding elements that are uncertain.

- On page 18, the authors write "We show that as a result of strong population heterogeneity (small  $\alpha$ ), the wave peaks when only a small minority of individuals have been infected, see Fig. 1 (d)-(f)." This is indeed true. However, upon analysing panels (a), (d), and (g) of Fig. 6, one notices that the model solution fit of the data (red solid line) present lower reported cases decrease rate than in the scenario without mitigation (red dotted line). This is particularly true after June. How can this be explained? It seems that, although the maximum is earlier achieved, the decrease rate is lower than in the case without mitigation. I suggest that the authors include a few sentences to discuss about this;

It is correct that in the case of the epidemics that is dying out because of mitigation (Fig. 6), we find that the rate of decay of cases is slower than without mitigation. This is similar to the idea to "flatten the curve", i.e. mitigation reduces the maximal number of infections but broadens the wave and thus makes it slower. However this feature is not completely general and we prefer not to enter this discussion.

- Section "Discussion" seems more like "Conclusions and Perspectives";

We have changes the discussion to "Conclusions and Perspectives"

- I believe that the number of references could be improved in this work since there are a lot of discussions throughout the manuscript that deserves more important references.

We have now added reference [28] on Lamberts W function and Ref. [35-37] for the SEIR and the SIRS model. We think that all statements that need backing by references have been referenced.

In summary, the work is relevant since in reality not everyone is equally susceptible to being infected and thus the authors' consideration of a susceptibility distribution among the population is solid and can indeed improve the understanding of the epidemics dissemination. I do recommend publication after minor revisions.

We thank the referee for a careful reading of our manuscript
